# Supplementary material for: Cell therapy for nonischemic dilated cardiomyopathy: A systematic review and meta‐analysis of randomized controlled trials
Source: PubMed Central journal article supplement — Stem Cells Transl Med. 2021 Aug 4;10(10):1394–405. doi: 10.1002/sctm.21-0094 (PMC8459637; doi:10.1002/sctm.21-0094), 2021-08-04

## Supplementary Appendix 1: Search Strategy.

|                           |                                                                                |
|---------------------------|--------------------------------------------------------------------------------|
| <b>Name of Search</b>     | Stem cell therapy in non-ischemic cardiomyopathy                               |
| <b>Databases Search</b>   | Ovid MEDLINE, Embase, Cochrane Central Register of Controlled Trials           |
| <b>Inclusion Criteria</b> |                                                                                |
| <b>Exclusion Criteria</b> | Hypertrophic cardiomyopathy, arrhythmogenic right ventricular dysplasia        |
| <b>Concept 1</b>          | Non-ischemic cardiomyopathy, dilated cardiomyopathy, idiopathic cardiomyopathy |
| <b>Concept 2</b>          | Stem cell therapy                                                              |

|                          |                                                                                                                                                                              |         |
|--------------------------|------------------------------------------------------------------------------------------------------------------------------------------------------------------------------|---------|
| <b>Database</b>          | Ovid MEDLINE                                                                                                                                                                 |         |
| <b>Platform</b>          | Ovid                                                                                                                                                                         |         |
| <b>Limits</b>            | Humans (search hedge)                                                                                                                                                        |         |
| <b>Number of Results</b> | 413                                                                                                                                                                          |         |
| <b>Notes</b>             | Included 'congestive' as keyword because listed as entry term for MeSH 'cardiomyopathy, dilated'; yielded 15 additional results                                              |         |
| 1                        | cardiomyopathy, dilated/                                                                                                                                                     | 15474   |
| 2                        | ((congest\$ or dilat\$ or idiopath\$ or non ischem\$ or nonischem\$ or non ischaem\$ or nonischaem\$) adj3 (cardiomyopath\$ or myocardiopath\$ or heart disease\$)).tw.      | 22443   |
| 3                        | or/1-2                                                                                                                                                                       | 27075   |
| 4                        | exp stem cell transplantation/                                                                                                                                               | 79778   |
| 5                        | exp stem cells/                                                                                                                                                              | 208913  |
| 6                        | ((cord or bone marrow or embryo\$ or fetal or foetal or hematopoe\$ or haematopoe\$ or mesenchymal or pluripoten\$ or precursor or progenitor or umbilical) adj3 cell\$).tw. | 318150  |
| 7                        | (stem cell\$ adj3 (administ\$ or inject\$ or therap\$ or transplant\$ or treat\$)).tw.                                                                                       | 67244   |
| 8                        | or/4-7                                                                                                                                                                       | 473452  |
| 9                        | and/3,8                                                                                                                                                                      | 506     |
| 10                       | animals/ not humans/                                                                                                                                                         | 4641136 |
| 11                       | 9 not 10                                                                                                                                                                     | 413     |

|                          |                                                                                                                                                                               |        |
|--------------------------|-------------------------------------------------------------------------------------------------------------------------------------------------------------------------------|--------|
| <b>Database</b>          | Embase                                                                                                                                                                        |        |
| <b>Platform</b>          | Elsevier                                                                                                                                                                      |        |
| <b>Years Searched</b>    | 1947 - Present                                                                                                                                                                |        |
| <b>Limits</b>            | Humans (search hedge)                                                                                                                                                         |        |
| <b>Number of Results</b> | 845                                                                                                                                                                           |        |
| <b>Notes</b>             | Tested Emtree term 'stem cells/exp'; yielded 137 additional results, not relevant                                                                                             |        |
| 1                        | 'nonischemic cardiomyopathy'/de                                                                                                                                               | 4256   |
| 2                        | 'congestive cardiomyopathy'/exp                                                                                                                                               | 30993  |
| 3                        | ((congest* OR dilat* OR idiopath* OR 'non ischem*' OR nonischem* OR 'non ischaem*' OR nonischaem*) NEAR/3 (cardiomyopath* OR myocardiopath* OR 'heart disease*')):ti,ab       | 36460  |
| 4                        | #1 OR #2 OR #3                                                                                                                                                                | 48043  |
| 5                        | 'stem cell transplantation'/exp                                                                                                                                               | 146747 |
| 6                        | ((cord OR 'bone marrow' OR embryo* OR fetal OR foetal OR hematopoe* OR haematopoe* OR mesenchymal OR pluripoten* OR precursor OR progenitor OR umbilical) NEAR/3 cell*):ti,ab | 431056 |

|    |                                                                                        |         |
|----|----------------------------------------------------------------------------------------|---------|
| 7  | ('stem cell*' NEAR/3 (administ* OR inject* OR therap* OR transplant* OR treat*)):ti,ab | 118479  |
| 8  | #5 OR #6 OR #7                                                                         | 565857  |
| 9  | #4 AND #8                                                                              | 1015    |
| 10 | [animals]/lim NOT [humans]/lim                                                         | 5993590 |
| 11 | #9 NOT #10                                                                             | 845     |

|                          |                                                                                                                                                                                            |       |
|--------------------------|--------------------------------------------------------------------------------------------------------------------------------------------------------------------------------------------|-------|
| <b>Database</b>          | Cochrane Central Register of Controlled Trials                                                                                                                                             |       |
| <b>Platform</b>          | Wiley                                                                                                                                                                                      |       |
| <b>Limits</b>            | None                                                                                                                                                                                       |       |
| <b>Number of Results</b> | 179                                                                                                                                                                                        |       |
| <b>Notes</b>             |                                                                                                                                                                                            |       |
| #1                       | [mh "cardiomyopathy, dilated"] in Trials                                                                                                                                                   | 536   |
| #2                       | ((congest* OR dilat* OR idiopath* OR "non ischem*" OR nonischem* OR "non ischaem*" OR nonischaem*) NEAR/3 (cardiomyopath* OR myocardiopath* OR 'heart disease*')):ti,ab,kw in Trials       | 9175  |
| #3                       | #1 OR #2 in Trials                                                                                                                                                                         | 9175  |
| #4                       | [mh "stem cell transplantation"] in Trials                                                                                                                                                 | 1904  |
| #5                       | [mh "stem cells"] in Trials                                                                                                                                                                | 798   |
| #6                       | ((cord OR "bone marrow" OR embryo* OR fetal OR foetal OR hematopoe* OR haematopoe* OR mesenchymal OR pluripoten* OR precursor OR progenitor OR umbilical) NEAR/3 cell*):ti,ab,kw in Trials | 8223  |
| #7                       | ("stem cell*" NEAR/3 (administ* OR inject* OR therap* OR transplant* OR treat*)):ti,ab,kw in Trials                                                                                        | 8945  |
| #8                       | #4 OR #5 OR #6 OR #7 in Trials                                                                                                                                                             | 15266 |
| #9                       | #3 AND #8 in Trials                                                                                                                                                                        | 179   |

**Supplementary Figure 1: Sensitivity analysis Forest plot after excluding four trials with high or unknown risk of detection and attrition bias (A) effect of stem cell therapy on left ventricular ejection fraction (B) effect of stem cell therapy on major adverse cardiac events (MACE)**

A.

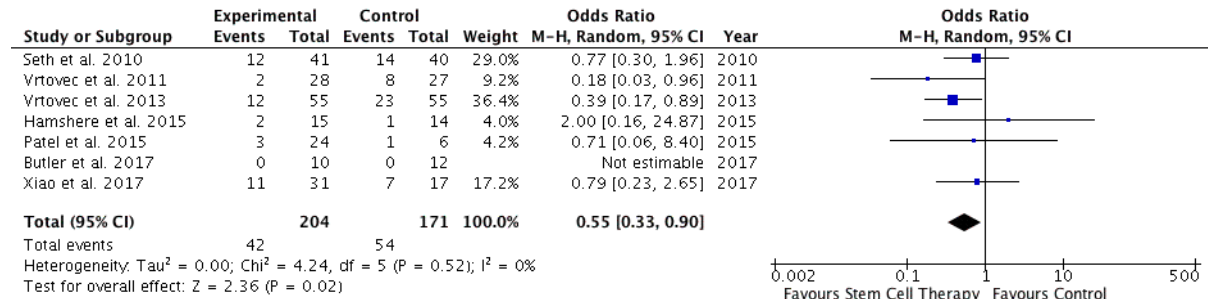

B.

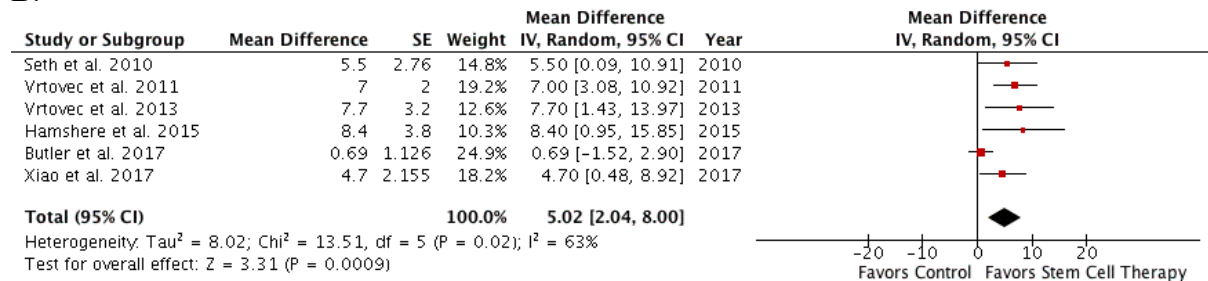

**Supplementary Figure 2: Forest plots of the effect of stem cell therapy on left ventricular end diastolic volume or diameter after excluding the trial with maximum weightage.**

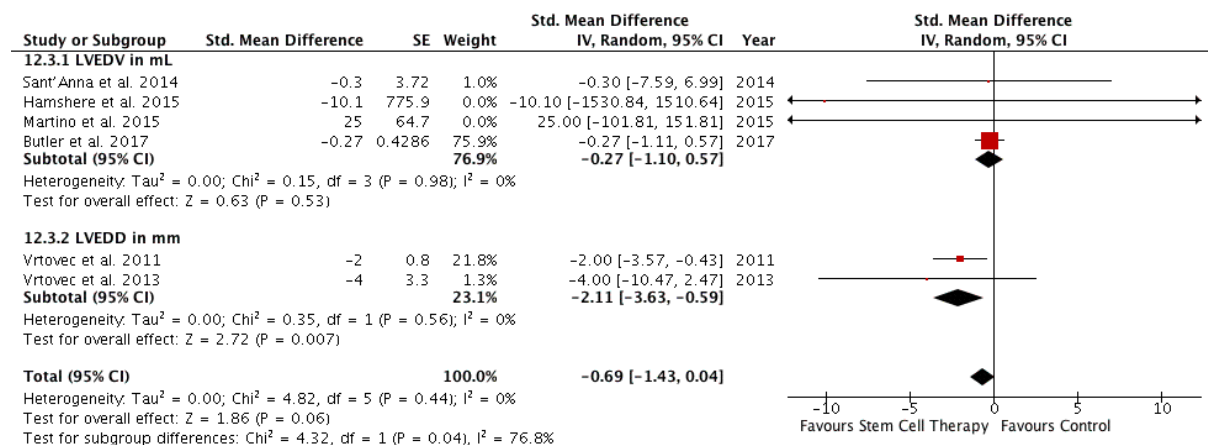

Supplement: SCT3-10-1394-s001.pdf [file SCT3-10-1394-s001.pdf]
